# Supplementary material for: Evaluating the performance of Bayesian and restricted maximum likelihood estimation for stepped wedge cluster randomized trials with a small number of clusters
Source: Springer Nature journal article supplement (doi:10.1186/s12874-022-01550-8), 2022-04-13
Supplement: MOESM1 [file 20309734]

# Additional file 1: Results tables, exploratory analyses and other supporting information

Evaluating the performance of Bayesian and restricted maximum likelihood estimation for stepped wedge cluster randomized trials with a small number of clusters

Kelsey L. Grantham, Jessica Kasza, Stephane Heritier, John B. Carlin, Andrew B. Forbes

## A Variance component formulae and implied distributions

Formulae for the cluster and cluster-period variances,  $\sigma_C^2$  and  $\sigma_{CP}^2$ , respectively, in terms of the primary parameters are given by:

$$\sigma_C^2 = r\sigma_e^2 \left( \frac{\rho_1}{1 - \rho_1} \right)$$
$$\sigma_{CP}^2 = \sigma_e^2 \left( \frac{\rho_1}{1 - \rho_1} \right) - \sigma_C^2$$

where  $r = \frac{\sigma_C^2}{\sigma_C^2 + \sigma_{CP}^2}$  and  $\rho_1 = \frac{\sigma_C^2 + \sigma_{CP}^2}{\sigma_C^2 + \sigma_{CP}^2 + \sigma_e^2}$  so that  $\frac{\rho_1}{1 - \rho_1} = \frac{\sigma_C^2 + \sigma_{CP}^2}{\sigma_e^2}$ .

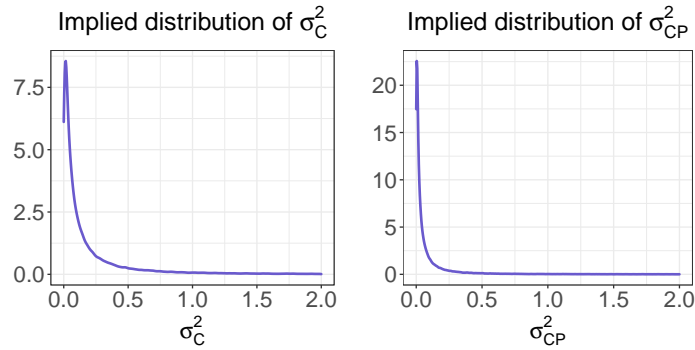

Figure A1: Implied distributions for the cluster and cluster-period variance parameters

## B Results tables of performance measures and associated Monte Carlo standard errors

Table B1: Estimated bias ( $\times 10,000$ ) for  $\hat{\theta}$  (MCSEs ( $\times 10,000$ ) in parentheses)

| $\rho_1$ | T | m   | S | r        |      |        |      |          |      |        |      |
|----------|---|-----|---|----------|------|--------|------|----------|------|--------|------|
|          |   |     |   | 0.8      |      |        |      | 1        |      |        |      |
|          |   |     |   | Bayesian |      | REML   |      | Bayesian |      | REML   |      |
| 0.05     | 5 | 10  | 1 | -37.60   | (78) | -43.50 | (80) | 22.87    | (79) | 22.03  | (79) |
|          |   |     | 2 | 33.30    | (52) | 28.35  | (53) | 5.40     | (54) | -1.47  | (54) |
|          |   |     | 5 | 33.14    | (35) | 29.85  | (35) | 22.33    | (34) | 22.51  | (34) |
|          |   | 100 | 1 | -32.49   | (38) | -37.10 | (37) | 34.78    | (38) | 2.20   | (25) |
|          |   |     | 2 | 3.96     | (25) | 6.32   | (25) | -8.57    | (18) | -6.81  | (18) |
|          |   |     | 5 | 16.09    | (16) | 15.72  | (16) | 9.08     | (12) | 9.27   | (12) |
|          | 9 | 10  | 1 | -33.75   | (40) | -26.28 | (40) | -32.90   | (38) | -32.15 | (38) |
|          |   |     | 2 | 24.47    | (28) | 24.13  | (28) | 8.05     | (26) | 9.94   | (26) |
|          |   |     | 5 | 29.72    | (18) | 29.13  | (18) | 13.60    | (17) | 13.97  | (17) |
|          |   | 100 | 1 | 21.55    | (18) | 22.24  | (18) | 11.52    | (13) | 14.16  | (13) |
|          |   |     | 2 | 13.87    | (13) | 14.14  | (13) | 10.74    | (9)  | 10.72  | (9)  |
|          |   |     | 5 | 4.96     | (8)  | 4.99   | (8)  | -0.44    | (6)  | -0.44  | (6)  |
| 0.1      | 5 | 10  | 1 | -39.75   | (85) | -42.82 | (88) | 44.48    | (81) | 27.37  | (82) |
|          |   |     | 2 | 38.00    | (58) | 38.32  | (59) | 8.82     | (56) | 6.38   | (56) |
|          |   |     | 5 | 44.39    | (38) | 41.38  | (38) | 23.34    | (35) | 23.93  | (35) |
|          |   | 100 | 1 | -58.17   | (46) | -47.96 | (46) | -4.36    | (31) | -0.03  | (26) |
|          |   |     | 2 | 8.92     | (32) | 10.63  | (32) | -6.36    | (18) | -7.37  | (18) |
|          |   |     | 5 | 26.41    | (20) | 26.38  | (20) | 9.01     | (12) | 9.00   | (12) |
|          | 9 | 10  | 1 | -37.27   | (43) | -32.45 | (43) | -22.24   | (39) | -24.81 | (39) |
|          |   |     | 2 | 30.03    | (31) | 30.12  | (31) | 5.63     | (27) | 6.64   | (27) |
|          |   |     | 5 | 32.10    | (20) | 31.63  | (20) | 13.72    | (18) | 13.63  | (18) |
|          |   | 100 | 1 | 18.26    | (23) | 20.09  | (23) | 12.85    | (13) | 14.37  | (13) |
|          |   |     | 2 | 19.95    | (16) | 20.38  | (16) | 9.78     | (9)  | 10.26  | (9)  |
|          |   |     | 5 | 7.22     | (10) | 7.41   | (10) | -0.42    | (6)  | -0.53  | (6)  |

Table B2: Estimated MSE ( $\times 10,000$ ) for  $\hat{\theta}$  (MCSEs ( $\times 10,000$ ) in parentheses)

| $\rho_1$ | T   | m   | S  | r        |        |        |        |          |        |        |        |        |
|----------|-----|-----|----|----------|--------|--------|--------|----------|--------|--------|--------|--------|
|          |     |     |    | 0.8      |        |        |        | 1        |        |        |        |        |
|          |     |     |    | Bayesian |        | REML   |        | Bayesian |        | REML   |        |        |
| 0.05     | 5   | 10  | 1  | 606      | (28.3) | 643    | (30.9) | 597      | (27.2) | 620    | (27.2) |        |
|          |     |     | 2  | 274      | (12.3) | 282    | (12.7) | 290      | (12.5) | 296    | (12.8) |        |
|          |     |     | 5  | 122      | (5.3)  | 124    | (5.5)  | 114      | (4.7)  | 115    | (4.7)  |        |
|          |     | 100 | 1  | 131      | (6.6)  | 136    | (6.4)  | 64       | (4.4)  | 65     | (2.9)  |        |
|          |     |     | 2  | 63       | (2.8)  | 63     | (2.8)  | 32       | (1.6)  | 32     | (1.5)  |        |
|          |     |     | 5  | 26       | (1.1)  | 26     | (1.1)  | 13       | (0.6)  | 13     | (0.6)  |        |
|          | 9   | 10  | 1  | 157      | (6.9)  | 163    | (7.3)  | 140      | (6.3)  | 143    | (6.5)  |        |
|          |     |     | 2  | 79       | (3.6)  | 80     | (3.6)  | 68       | (3.0)  | 69     | (3.0)  |        |
|          |     |     | 5  | 33       | (1.5)  | 33     | (1.5)  | 30       | (1.3)  | 30     | (1.3)  |        |
|          |     | 100 | 1  | 33       | (1.5)  | 33     | (1.6)  | 15       | (0.7)  | 16     | (0.7)  |        |
|          |     |     | 2  | 17       | (0.8)  | 17     | (0.8)  | 9        | (0.4)  | 9      | (0.4)  |        |
|          |     |     | 5  | 7        | (0.3)  | 7      | (0.3)  | 3        | (0.2)  | 3      | (0.2)  |        |
|          | 0.1 | 5   | 10 | 1        | 725    | (33.3) | 770    | (35.7)   | 637    | (29.0) | 664    | (29.4) |
|          |     |     |    | 2        | 332    | (15.0) | 343    | (15.6)   | 310    | (13.4) | 316    | (13.8) |
|          |     |     |    | 5        | 145    | (6.4)  | 146    | (6.5)    | 122    | (5.0)  | 122    | (5.0)  |
| 100      |     |     | 1  | 204      | (9.9)  | 214    | (10.1) | 64       | (3.5)  | 65     | (3.0)  |        |
|          |     |     | 2  | 100      | (4.5)  | 101    | (4.5)  | 33       | (1.6)  | 33     | (1.6)  |        |
|          |     |     | 5  | 41       | (1.8)  | 41     | (1.8)  | 14       | (0.6)  | 14     | (0.6)  |        |
| 9        |     | 10  | 1  | 186      | (8.1)  | 188    | (8.3)  | 149      | (6.6)  | 150    | (6.7)  |        |
|          |     |     | 2  | 94       | (4.2)  | 95     | (4.3)  | 73       | (3.2)  | 73     | (3.2)  |        |
|          |     |     | 5  | 39       | (1.8)  | 39     | (1.8)  | 32       | (1.4)  | 32     | (1.4)  |        |
|          |     | 100 | 1  | 53       | (2.4)  | 53     | (2.5)  | 16       | (0.7)  | 16     | (0.7)  |        |
|          |     |     | 2  | 27       | (1.2)  | 27     | (1.2)  | 9        | (0.4)  | 9      | (0.4)  |        |
|          |     |     | 5  | 11       | (0.5)  | 11     | (0.5)  | 3        | (0.2)  | 3      | (0.2)  |        |

Table B3: Estimated confidence/credible interval coverage for  $\hat{\theta}$  (MCSEs in parentheses)

| $\rho_1$ | T | m   | S | r        |         |           |          |       |           |          |         |           |          |       |           |
|----------|---|-----|---|----------|---------|-----------|----------|-------|-----------|----------|---------|-----------|----------|-------|-----------|
|          |   |     |   | 0.8      |         |           |          |       | 1         |          |         |           |          |       |           |
|          |   |     |   | Bayesian | REML    | REML (KR) | Bayesian | REML  | REML (KR) | Bayesian | REML    | REML (KR) | Bayesian | REML  | REML (KR) |
| 0.05     | 5 | 10  | 1 | 0.967    | (0.006) | 0.928     | (0.009)  | 0.981 | (0.005)   | 0.951    | (0.007) | 0.927     | (0.008)  | 0.957 | (0.006)   |
|          |   |     | 2 | 0.967    | (0.006) | 0.953     | (0.007)  | 0.968 | (0.006)   | 0.945    | (0.007) | 0.931     | (0.008)  | 0.945 | (0.007)   |
|          |   |     | 5 | 0.954    | (0.007) | 0.950     | (0.007)  | 0.957 | (0.006)   | 0.962    | (0.006) | 0.960     | (0.006)  | 0.961 | (0.006)   |
|          |   | 100 | 1 | 0.962    | (0.006) | 0.919     | (0.009)  | 0.952 | (0.007)   | 0.950    | (0.010) | 0.943     | (0.007)  | 0.947 | (0.007)   |
|          |   |     | 2 | 0.951    | (0.007) | 0.938     | (0.008)  | 0.951 | (0.007)   | 0.951    | (0.007) | 0.949     | (0.007)  | 0.952 | (0.007)   |
|          |   |     | 5 | 0.959    | (0.006) | 0.955     | (0.007)  | 0.957 | (0.006)   | 0.950    | (0.007) | 0.948     | (0.007)  | 0.950 | (0.007)   |
|          | 9 | 10  | 1 | 0.959    | (0.006) | 0.930     | (0.008)  | 0.953 | (0.007)   | 0.958    | (0.006) | 0.950     | (0.007)  | 0.959 | (0.006)   |
|          |   |     | 2 | 0.948    | (0.007) | 0.944     | (0.007)  | 0.952 | (0.007)   | 0.963    | (0.006) | 0.961     | (0.006)  | 0.966 | (0.006)   |
|          |   |     | 5 | 0.948    | (0.007) | 0.945     | (0.007)  | 0.947 | (0.007)   | 0.949    | (0.007) | 0.948     | (0.007)  | 0.950 | (0.007)   |
|          |   | 100 | 1 | 0.956    | (0.006) | 0.949     | (0.007)  | 0.954 | (0.007)   | 0.956    | (0.007) | 0.952     | (0.007)  | 0.953 | (0.007)   |
|          |   |     | 2 | 0.947    | (0.007) | 0.944     | (0.007)  | 0.948 | (0.007)   | 0.944    | (0.007) | 0.948     | (0.007)  | 0.949 | (0.007)   |
|          |   |     | 5 | 0.946    | (0.007) | 0.947     | (0.007)  | 0.947 | (0.007)   | 0.951    | (0.007) | 0.952     | (0.007)  | 0.952 | (0.007)   |
| 0.1      | 5 | 10  | 1 | 0.955    | (0.007) | 0.924     | (0.009)  | 0.972 | (0.005)   | 0.943    | (0.007) | 0.928     | (0.008)  | 0.958 | (0.006)   |
|          |   |     | 2 | 0.961    | (0.006) | 0.949     | (0.007)  | 0.966 | (0.006)   | 0.943    | (0.007) | 0.936     | (0.008)  | 0.944 | (0.007)   |
|          |   |     | 5 | 0.954    | (0.007) | 0.948     | (0.007)  | 0.951 | (0.007)   | 0.958    | (0.006) | 0.956     | (0.006)  | 0.956 | (0.006)   |
|          |   | 100 | 1 | 0.957    | (0.006) | 0.918     | (0.009)  | 0.948 | (0.007)   | 0.945    | (0.009) | 0.946     | (0.007)  | 0.947 | (0.007)   |
|          |   |     | 2 | 0.955    | (0.007) | 0.940     | (0.008)  | 0.952 | (0.007)   | 0.949    | (0.007) | 0.950     | (0.007)  | 0.950 | (0.007)   |
|          |   |     | 5 | 0.963    | (0.006) | 0.957     | (0.006)  | 0.962 | (0.006)   | 0.951    | (0.007) | 0.951     | (0.007)  | 0.951 | (0.007)   |
|          | 9 | 10  | 1 | 0.952    | (0.007) | 0.940     | (0.008)  | 0.955 | (0.007)   | 0.957    | (0.006) | 0.952     | (0.007)  | 0.959 | (0.006)   |
|          |   |     | 2 | 0.949    | (0.007) | 0.933     | (0.008)  | 0.942 | (0.007)   | 0.962    | (0.006) | 0.961     | (0.006)  | 0.964 | (0.006)   |
|          |   |     | 5 | 0.947    | (0.007) | 0.945     | (0.007)  | 0.947 | (0.007)   | 0.951    | (0.007) | 0.951     | (0.007)  | 0.951 | (0.007)   |
|          |   | 100 | 1 | 0.949    | (0.007) | 0.941     | (0.007)  | 0.952 | (0.007)   | 0.954    | (0.007) | 0.957     | (0.006)  | 0.957 | (0.006)   |
|          |   |     | 2 | 0.946    | (0.007) | 0.940     | (0.008)  | 0.946 | (0.007)   | 0.945    | (0.007) | 0.944     | (0.007)  | 0.944 | (0.007)   |
|          |   |     | 5 | 0.957    | (0.006) | 0.956     | (0.006)  | 0.956 | (0.006)   | 0.953    | (0.007) | 0.954     | (0.007)  | 0.954 | (0.007)   |

Table B4: Estimated relative % error in model-based SE for  $\hat{\theta}$  (MCSEs in parentheses)

| $\rho_1$ | T | m   | S | r           |             |             |             |             |             |
|----------|---|-----|---|-------------|-------------|-------------|-------------|-------------|-------------|
|          |   |     |   | 0.8         |             |             | 1           |             |             |
|          |   |     |   | Bayesian    | REML        | REML (KR)   | Bayesian    | REML        | REML (KR)   |
| 0.05     | 5 | 10  | 1 | 9.00 (2.5)  | -3.19 (2.2) | 11.98 (2.6) | 0.14 (2.3)  | -8.12 (2.1) | 1.79 (2.3)  |
|          |   |     | 2 | 10.42 (2.5) | 3.02 (2.3)  | 9.35 (2.5)  | 0.05 (2.2)  | -4.53 (2.1) | -0.46 (2.2) |
|          |   |     | 5 | 1.61 (2.3)  | -1.87 (2.2) | 0.22 (2.3)  | -0.02 (2.2) | -1.75 (2.2) | -0.30 (2.2) |
|          |   | 100 | 1 | 11.89 (2.7) | -6.02 (2.2) | 0.83 (2.4)  | 1.47 (3.4)  | -1.39 (2.2) | 1.44 (2.3)  |
|          |   |     | 2 | 6.79 (2.4)  | -0.32 (2.3) | 2.15 (2.3)  | 1.55 (2.3)  | 0.07 (2.2)  | 0.95 (2.3)  |
|          |   |     | 5 | 1.96 (2.3)  | -0.46 (2.2) | 0.31 (2.3)  | -1.14 (2.2) | -1.41 (2.2) | -1.14 (2.2) |
|          | 9 | 10  | 1 | 4.89 (2.4)  | -1.85 (2.2) | 2.84 (2.3)  | 4.88 (2.4)  | 0.50 (2.3)  | 4.07 (2.3)  |
|          |   |     | 2 | 2.92 (2.3)  | -0.36 (2.2) | 1.70 (2.3)  | 5.62 (2.4)  | 3.69 (2.3)  | 5.30 (2.4)  |
|          |   |     | 5 | 0.21 (2.2)  | -1.23 (2.2) | -0.48 (2.2) | 0.23 (2.2)  | -0.33 (2.2) | 0.24 (2.2)  |
|          |   | 100 | 1 | 3.47 (2.3)  | -0.68 (2.2) | 0.94 (2.3)  | 4.79 (2.5)  | 2.93 (2.3)  | 3.56 (2.3)  |
|          |   |     | 2 | 0.42 (2.3)  | -1.22 (2.2) | -0.58 (2.2) | -1.37 (2.2) | -1.62 (2.2) | -1.38 (2.2) |
|          |   |     | 5 | -1.68 (2.2) | -2.22 (2.2) | -2.22 (2.2) | 1.48 (2.3)  | 1.39 (2.3)  | 1.39 (2.3)  |
| 0.1      | 5 | 10  | 1 | 4.45 (2.4)  | -4.52 (2.2) | 7.42 (2.5)  | -1.63 (2.2) | -7.65 (2.1) | -0.44 (2.2) |
|          |   |     | 2 | 6.98 (2.4)  | 1.35 (2.3)  | 6.15 (2.4)  | -0.92 (2.2) | -3.68 (2.2) | -0.87 (2.2) |
|          |   |     | 5 | 0.65 (2.3)  | -1.88 (2.2) | -0.34 (2.2) | -0.33 (2.2) | -1.07 (2.2) | -0.12 (2.2) |
|          |   | 100 | 1 | 7.99 (2.5)  | -5.57 (2.2) | 0.14 (2.3)  | 1.39 (2.8)  | -0.48 (2.2) | 1.11 (2.3)  |
|          |   |     | 2 | 5.29 (2.4)  | -0.08 (2.3) | 1.91 (2.3)  | 0.26 (2.3)  | 0.19 (2.2)  | 0.64 (2.3)  |
|          |   |     | 5 | 2.09 (2.3)  | 0.10 (2.3)  | 0.72 (2.3)  | -1.27 (2.2) | -1.35 (2.2) | -1.22 (2.2) |
|          | 9 | 10  | 1 | 2.87 (2.3)  | -0.99 (2.2) | 2.36 (2.3)  | 3.78 (2.3)  | 1.89 (2.3)  | 4.18 (2.3)  |
|          |   |     | 2 | 1.72 (2.3)  | -0.45 (2.2) | 0.96 (2.3)  | 4.88 (2.3)  | 4.13 (2.3)  | 5.11 (2.4)  |
|          |   |     | 5 | -0.73 (2.2) | -1.52 (2.2) | -1.01 (2.2) | 0.27 (2.2)  | 0.04 (2.2)  | 0.38 (2.2)  |
|          |   | 100 | 1 | 2.34 (2.3)  | -0.63 (2.2) | 0.63 (2.3)  | 3.09 (2.3)  | 3.36 (2.3)  | 3.68 (2.3)  |
|          |   |     | 2 | 1.05 (2.3)  | -0.39 (2.2) | 0.12 (2.2)  | -1.27 (2.2) | -1.38 (2.2) | -1.26 (2.2) |
|          |   |     | 5 | -0.70 (2.2) | -1.13 (2.2) | -1.13 (2.2) | 1.34 (2.3)  | 1.39 (2.3)  | 1.39 (2.3)  |

Table B5: Width of estimated confidence/credible intervals for  $\hat{\theta}$

| $\rho_1$ | T | m   | S | r        |      |           |          |      |           |
|----------|---|-----|---|----------|------|-----------|----------|------|-----------|
|          |   |     |   | 0.8      |      |           | 1        |      |           |
|          |   |     |   | Bayesian | REML | REML (KR) | Bayesian | REML | REML (KR) |
| 0.05     | 5 | 10  | 1 | 1.05     | 0.95 | 1.22      | 0.96     | 0.89 | 1.03      |
|          |   |     | 2 | 0.72     | 0.68 | 0.75      | 0.67     | 0.64 | 0.68      |
|          |   |     | 5 | 0.44     | 0.43 | 0.44      | 0.42     | 0.41 | 0.42      |
|          |   | 100 | 1 | 0.50     | 0.42 | 0.50      | 0.32     | 0.31 | 0.32      |
|          |   |     | 2 | 0.33     | 0.31 | 0.33      | 0.22     | 0.22 | 0.22      |
|          |   |     | 5 | 0.20     | 0.20 | 0.20      | 0.14     | 0.14 | 0.14      |
|          | 9 | 10  | 1 | 0.52     | 0.49 | 0.53      | 0.49     | 0.47 | 0.49      |
|          |   |     | 2 | 0.36     | 0.35 | 0.36      | 0.34     | 0.34 | 0.34      |
|          |   |     | 5 | 0.22     | 0.22 | 0.22      | 0.22     | 0.21 | 0.22      |
|          |   | 100 | 1 | 0.23     | 0.22 | 0.23      | 0.16     | 0.16 | 0.16      |
|          |   |     | 2 | 0.16     | 0.16 | 0.16      | 0.11     | 0.11 | 0.11      |
|          |   |     | 5 | 0.10     | 0.10 | 0.10      | 0.07     | 0.07 | 0.07      |
| 0.1      | 5 | 10  | 1 | 1.10     | 1.03 | 1.28      | 0.97     | 0.93 | 1.03      |
|          |   |     | 2 | 0.76     | 0.73 | 0.80      | 0.68     | 0.67 | 0.69      |
|          |   |     | 5 | 0.47     | 0.46 | 0.48      | 0.43     | 0.43 | 0.43      |
|          |   | 100 | 1 | 0.60     | 0.53 | 0.62      | 0.32     | 0.32 | 0.32      |
|          |   |     | 2 | 0.41     | 0.39 | 0.41      | 0.22     | 0.22 | 0.23      |
|          |   |     | 5 | 0.26     | 0.25 | 0.26      | 0.14     | 0.14 | 0.14      |
|          | 9 | 10  | 1 | 0.55     | 0.53 | 0.56      | 0.50     | 0.49 | 0.50      |
|          |   |     | 2 | 0.39     | 0.38 | 0.39      | 0.35     | 0.35 | 0.35      |
|          |   |     | 5 | 0.24     | 0.24 | 0.24      | 0.22     | 0.22 | 0.22      |
|          |   | 100 | 1 | 0.29     | 0.28 | 0.29      | 0.16     | 0.16 | 0.16      |
|          |   |     | 2 | 0.21     | 0.20 | 0.21      | 0.11     | 0.11 | 0.11      |
|          |   |     | 5 | 0.13     | 0.13 | 0.13      | 0.07     | 0.07 | 0.07      |

Table B6: Estimated bias ( $\times 10,000$ ) for  $\hat{\rho}_1$  (MCSEs ( $\times 10,000$ ) in parentheses)

| $\rho_1$ | T | m   | S | r        |      |         |      |          |      |         |      |
|----------|---|-----|---|----------|------|---------|------|----------|------|---------|------|
|          |   |     |   | 0.8      |      |         |      | 1        |      |         |      |
|          |   |     |   | Bayesian |      | REML    |      | Bayesian |      | REML    |      |
| 0.05     | 5 | 10  | 1 | 280.23   | (10) | 112.57  | (17) | 312.05   | (10) | 28.57   | (16) |
|          |   |     | 2 | 152.15   | (9)  | 44.10   | (11) | 165.28   | (9)  | - 5.24  | (12) |
|          |   |     | 5 | 60.44    | (6)  | 7.26    | (7)  | 70.81    | (6)  | - 5.29  | (7)  |
|          |   | 100 | 1 | 122.99   | (8)  | 2.44    | (11) | 441.43   | (12) | 4.57    | (12) |
|          |   |     | 2 | 41.68    | (6)  | - 7.41  | (7)  | 147.74   | (8)  | - 5.26  | (8)  |
|          |   |     | 5 | 14.24    | (4)  | - 6.95  | (4)  | 54.22    | (5)  | - 6.53  | (5)  |
|          | 9 | 10  | 1 | 111.49   | (8)  | 16.91   | (9)  | 151.58   | (9)  | - 8.07  | (10) |
|          |   |     | 2 | 72.40    | (6)  | 16.90   | (7)  | 76.25    | (6)  | - 8.51  | (7)  |
|          |   |     | 5 | 36.89    | (4)  | 8.51    | (4)  | 36.29    | (4)  | 1.40    | (4)  |
|          |   | 100 | 1 | 26.17    | (5)  | - 9.42  | (7)  | 163.51   | (8)  | - 8.28  | (8)  |
|          |   |     | 2 | 17.97    | (4)  | - 3.45  | (5)  | 67.69    | (6)  | - 7.28  | (5)  |
|          |   |     | 5 | 10.40    | (3)  | 1.20    | (3)  | 30.45    | (3)  | 0.05    | (3)  |
| 0.1      | 5 | 10  | 1 | 23.23    | (14) | 55.71   | (25) | 57.17    | (13) | - 5.95  | (26) |
|          |   |     | 2 | - 0.71   | (12) | - 0.38  | (16) | 27.18    | (13) | - 28.00 | (18) |
|          |   |     | 5 | - 12.09  | (9)  | - 21.65 | (10) | 22.22    | (9)  | - 15.00 | (11) |
|          |   | 100 | 1 | - 28.12  | (11) | - 18.39 | (19) | 231.50   | (13) | - 18.95 | (22) |
|          |   |     | 2 | - 29.35  | (9)  | - 23.46 | (13) | 52.16    | (12) | - 22.80 | (15) |
|          |   |     | 5 | - 17.58  | (7)  | - 16.08 | (8)  | 27.16    | (8)  | - 16.98 | (9)  |
|          | 9 | 10  | 1 | - 19.71  | (11) | - 19.23 | (14) | 39.16    | (12) | - 26.87 | (16) |
|          |   |     | 2 | - 0.02   | (9)  | - 3.26  | (10) | 27.58    | (10) | - 20.25 | (11) |
|          |   |     | 5 | 4.52     | (6)  | 4.10    | (6)  | 23.82    | (7)  | 0.28    | (7)  |
|          |   | 100 | 1 | - 41.81  | (8)  | - 25.16 | (12) | 63.64    | (12) | - 26.65 | (15) |
|          |   |     | 2 | - 16.68  | (7)  | - 10.60 | (8)  | 33.72    | (9)  | - 18.57 | (10) |
|          |   |     | 5 | - 1.31   | (5)  | 0.78    | (5)  | 23.29    | (6)  | - 1.57  | (6)  |

Table B7: Estimated MSE ( $\times 10,000$ ) for  $\hat{\rho}_1$  (MCSEs ( $\times 10,000$ ) in parentheses)

| $\rho_1$ | T   | m   | S  | r        |        |        |        |          |        |        |        |        |
|----------|-----|-----|----|----------|--------|--------|--------|----------|--------|--------|--------|--------|
|          |     |     |    | 0.8      |        |        |        | 1        |        |        |        |        |
|          |     |     |    | Bayesian |        | REML   |        | Bayesian |        | REML   |        |        |
| 0.05     | 5   | 10  | 1  | 18.0     | (0.99) | 31.2   | (1.90) | 18.6     | (0.87) | 27.2   | (1.51) |        |
|          |     |     | 2  | 10.3     | (0.56) | 12.7   | (0.63) | 11.5     | (0.58) | 13.2   | (0.66) |        |
|          |     |     | 5  | 4.2      | (0.20) | 4.5    | (0.20) | 4.6      | (0.24) | 4.5    | (0.22) |        |
|          |     | 100 | 1  | 6.8      | (0.37) | 11.6   | (0.74) | 25.8     | (1.29) | 14.9   | (0.93) |        |
|          |     |     | 2  | 3.7      | (0.19) | 5.1    | (0.24) | 8.5      | (0.40) | 6.8    | (0.31) |        |
|          |     |     | 5  | 1.5      | (0.07) | 1.8    | (0.08) | 2.9      | (0.14) | 2.4    | (0.11) |        |
|          |     | 9   | 10 | 1        | 7.4    | (0.39) | 8.6    | (0.47)   | 9.7    | (0.47) | 9.2    | (0.46) |
|          |     |     |    | 2        | 4.2    | (0.20) | 4.3    | (0.19)   | 4.8    | (0.23) | 4.3    | (0.19) |
|          |     |     |    | 5        | 1.6    | (0.08) | 1.7    | (0.08)   | 1.8    | (0.09) | 1.7    | (0.08) |
|          | 100 |     | 1  | 3.0      | (0.14) | 4.5    | (0.22) | 8.5      | (0.43) | 6.4    | (0.31) |        |
|          |     |     | 2  | 1.7      | (0.07) | 2.0    | (0.09) | 3.5      | (0.16) | 2.9    | (0.12) |        |
|          |     |     | 5  | 0.7      | (0.03) | 0.8    | (0.03) | 1.2      | (0.06) | 1.1    | (0.05) |        |
|          | 0.1 | 5   | 10 | 1        | 18.3   | (0.89) | 62.3   | (3.18)   | 17.6   | (0.81) | 66.9   | (3.21) |
|          |     |     |    | 2        | 15.0   | (0.63) | 27.0   | (1.18)   | 17.1   | (0.72) | 32.6   | (1.44) |
|          |     |     |    | 5        | 7.7    | (0.32) | 10.0   | (0.43)   | 9.0    | (0.42) | 11.4   | (0.53) |
| 100      |     |     | 1  | 11.7     | (0.52) | 36.0   | (2.00) | 17.4     | (1.08) | 46.9   | (2.49) |        |
|          |     |     | 2  | 8.3      | (0.34) | 16.5   | (0.72) | 14.2     | (0.60) | 22.4   | (0.96) |        |
|          |     |     | 5  | 4.3      | (0.18) | 5.9    | (0.26) | 7.1      | (0.32) | 8.3    | (0.37) |        |
| 9        |     |     | 10 | 1        | 12.0   | (0.52) | 20.9   | (0.99)   | 15.1   | (0.65) | 26.1   | (1.17) |
|          |     |     |    | 2        | 7.7    | (0.32) | 10.3   | (0.43)   | 9.7    | (0.42) | 12.4   | (0.54) |
|          |     |     |    | 5        | 3.4    | (0.15) | 3.9    | (0.18)   | 4.5    | (0.20) | 4.8    | (0.22) |
|          |     | 100 | 1  | 7.3      | (0.29) | 15.2   | (0.69) | 13.4     | (0.61) | 21.8   | (0.97) |        |
|          |     |     | 2  | 4.7      | (0.19) | 7.0    | (0.29) | 8.3      | (0.35) | 10.1   | (0.42) |        |
|          |     |     | 5  | 2.2      | (0.09) | 2.7    | (0.11) | 3.6      | (0.16) | 3.8    | (0.16) |        |



Table B8: Estimated bias ( $\times 10,000$ ) for  $\hat{\rho}$  (MCSEs ( $\times 10,000$ ) in parentheses)

| $\rho_1$ | T   | m   | S    | Bayesian |      | REML  |       |       |
|----------|-----|-----|------|----------|------|-------|-------|-------|
| 0.05     | 5   | 10  | 1    | -581     | (12) | -1555 | (130) |       |
|          |     |     | 2    | -573     | (18) | -1010 | (110) |       |
|          |     |     | 5    | -493     | (21) | -395  | (78)  |       |
|          | 9   | 100 | 1    | -99      | (21) | -742  | (84)  |       |
|          |     |     | 2    | -135     | (24) | -419  | (52)  |       |
|          |     |     | 5    | -105     | (22) | -176  | (29)  |       |
|          |     | 10  | 1    | -444     | (19) | -597  | (89)  |       |
|          |     |     | 2    | -366     | (22) | -211  | (65)  |       |
|          |     |     | 5    | -186     | (23) | 57    | (44)  |       |
|          | 100 | 1   | -84  | (24)     | -393 | (45)  |       |       |
|          |     | 2   | -95  | (20)     | -211 | (27)  |       |       |
|          |     | 5   | -28  | (13)     | -59  | (15)  |       |       |
|          | 0.1 | 5   | 10   | 1        | -525 | (14)  | -1018 | (110) |
|          |     |     |      | 2        | -446 | (21)  | -607  | (88)  |
|          |     |     |      | 5        | -274 | (23)  | -145  | (54)  |
| 9        |     | 100 | 1    | -313     | (23) | -797  | (76)  |       |
|          |     |     | 2    | -300     | (24) | -443  | (46)  |       |
|          |     |     | 5    | -183     | (20) | -176  | (25)  |       |
|          |     | 10  | 1    | -302     | (22) | -375  | (68)  |       |
|          |     |     | 2    | -178     | (23) | -106  | (46)  |       |
|          |     |     | 5    | -22      | (21) | 24    | (29)  |       |
| 100      |     | 1   | -269 | (24)     | -413 | (41)  |       |       |
|          |     | 2   | -190 | (19)     | -207 | (25)  |       |       |
|          |     | 5   | -69  | (12)     | -60  | (13)  |       |       |

Table B9: Estimated MSE ( $\times 10,000$ ) for  $\hat{r}$  (MCSEs ( $\times 10,000$ ) in parentheses)

| $\rho_1$ | T   | m   | S  | Bayesian |       | REML  |        |        |
|----------|-----|-----|----|----------|-------|-------|--------|--------|
| 0.05     | 5   | 10  | 1  | 48       | (1.8) | 1729  | (77.7) |        |
|          |     |     | 2  | 65       | (3.5) | 1288  | (61.8) |        |
|          |     |     | 5  | 69       | (3.5) | 618   | (32.0) |        |
|          |     | 100 | 1  | 41       | (1.9) | 756   | (46.9) |        |
|          |     |     | 2  | 58       | (2.8) | 285   | (20.3) |        |
|          |     |     | 5  | 48       | (2.5) | 85    | (5.1)  |        |
|          |     | 9   | 10 | 1        | 54    | (2.6) | 822    | (41.7) |
|          |     |     |    | 2        | 62    | (3.7) | 423    | (21.5) |
|          |     |     |    | 5        | 55    | (3.1) | 198    | (7.7)  |
|          | 100 |     | 1  | 59       | (2.9) | 214   | (15.3) |        |
|          |     |     | 2  | 41       | (2.7) | 76    | (6.0)  |        |
|          |     |     | 5  | 18       | (0.9) | 22    | (1.1)  |        |
|          | 0.1 | 5   | 10 | 1        | 48    | (2.1) | 1251   | (64.0) |
|          |     |     |    | 2        | 65    | (3.8) | 815    | (44.9) |
|          |     |     |    | 5        | 62    | (3.4) | 297    | (16.1) |
| 100      |     |     | 1  | 62       | (2.7) | 634   | (42.8) |        |
|          |     |     | 2  | 67       | (3.5) | 231   | (17.6) |        |
|          |     |     | 5  | 42       | (2.3) | 63    | (3.9)  |        |
| 9        |     |     | 10 | 1        | 56    | (2.7) | 477    | (28.0) |
|          |     |     |    | 2        | 57    | (3.3) | 213    | (11.3) |
|          |     |     |    | 5        | 42    | (2.1) | 81     | (3.8)  |
|          |     | 100 | 1  | 64       | (3.4) | 186   | (13.3) |        |
|          |     |     | 2  | 39       | (2.7) | 65    | (5.1)  |        |
|          |     |     | 5  | 15       | (0.8) | 18    | (1.0)  |        |

## C Session info and package dependencies

```
- Session info -----  
setting value  
version R version 4.0.0 (2020-04-24)  
os      CentOS Linux 7 (Core)  
system  x86_64, linux-gnu  
ui      X11  
language (EN)  
collate en_AU.UTF-8  
ctype   en_AU.UTF-8  
tz      Australia/Melbourne  
date    2021-05-18
```

```
- Packages (rstan) -----  
package      * version      date      lib source  
assertthat   0.2.1        2019-03-21 [1] CRAN (R 4.0.0)  
backports    1.1.9        2020-08-24 [1] CRAN (R 4.0.0)  
BH           1.75.0-0     2021-01-11 [1] CRAN (R 4.0.0)  
callr        3.5.1        2020-10-13 [1] CRAN (R 4.0.0)  
checkmate    2.0.0        2020-02-06 [1] CRAN (R 4.0.0)  
cli          2.3.1        2021-02-23 [1] CRAN (R 4.0.0)  
colorspace   2.0-0        2020-11-11 [1] CRAN (R 4.0.0)  
crayon       1.4.1        2021-02-08 [1] CRAN (R 4.0.0)  
curl         4.3          2019-12-02 [1] CRAN (R 4.0.0)  
desc         1.2.0        2018-05-01 [1] CRAN (R 4.0.0)  
digest       0.6.27       2020-10-24 [1] CRAN (R 4.0.0)  
ellipsis     0.3.1        2020-05-15 [1] CRAN (R 4.0.0)  
fans         0.4.2        2021-01-15 [1] CRAN (R 4.0.0)  
farver       2.1.0        2021-02-28 [1] CRAN (R 4.0.0)  
ggplot2      3.3.3        2020-12-30 [1] CRAN (R 4.0.0)  
glue         1.4.2        2020-08-27 [1] CRAN (R 4.0.0)  
gridExtra    2.3          2017-09-09 [1] CRAN (R 4.0.0)  
gtable       0.3.0        2019-03-25 [1] CRAN (R 4.0.0)  
inline       0.3.17       2020-12-01 [1] CRAN (R 4.0.0)  
isoband      0.2.4        2021-03-03 [1] CRAN (R 4.0.0)  
jsonlite     1.7.2        2020-12-09 [1] CRAN (R 4.0.0)  
labeling     0.4.2        2020-10-20 [1] CRAN (R 4.0.0)  
lattice      0.20-41     2020-04-02 [1] CRAN (R 4.0.0)  
lifecycle    1.0.0        2021-02-15 [1] CRAN (R 4.0.0)  
loo          2.4.1        2020-12-09 [1] CRAN (R 4.0.0)  
magrittr     2.0.1        2020-11-17 [1] CRAN (R 4.0.0)  
MASS         7.3-53       2020-09-09 [1] CRAN (R 4.0.0)  
Matrix       1.3-2        2021-01-06 [1] CRAN (R 4.0.0)  
matrixStats  0.58.0       2021-01-29 [1] CRAN (R 4.0.0)  
mgcv         1.8-33       2020-08-27 [1] CRAN (R 4.0.0)
```

|              |           |            |     |      |           |
|--------------|-----------|------------|-----|------|-----------|
| munsell      | 0.5.0     | 2018-06-12 | [1] | CRAN | (R 4.0.0) |
| nlme         | 3.1-152   | 2021-02-04 | [1] | CRAN | (R 4.0.0) |
| pillar       | 1.5.1     | 2021-03-05 | [1] | CRAN | (R 4.0.0) |
| pkgbuild     | 1.2.0     | 2020-12-15 | [1] | CRAN | (R 4.0.0) |
| pkgconfig    | 2.0.3     | 2019-09-22 | [1] | CRAN | (R 4.0.0) |
| prettyunits  | 1.1.1     | 2020-01-24 | [1] | CRAN | (R 4.0.0) |
| processx     | 3.4.4     | 2020-09-03 | [1] | CRAN | (R 4.0.0) |
| ps           | 1.3.4     | 2020-08-11 | [1] | CRAN | (R 4.0.0) |
| R6           | 2.5.0     | 2020-10-28 | [1] | CRAN | (R 4.0.0) |
| RColorBrewer | 1.1-2     | 2014-12-07 | [1] | CRAN | (R 4.0.0) |
| Rcpp         | 1.0.6     | 2021-01-15 | [1] | CRAN | (R 4.0.0) |
| RcppEigen    | 0.3.3.9.1 | 2020-12-17 | [1] | CRAN | (R 4.0.0) |
| RcppParallel | 5.0.2     | 2020-06-24 | [1] | CRAN | (R 4.0.0) |
| rlang        | 0.4.10    | 2020-12-30 | [1] | CRAN | (R 4.0.0) |
| rprojroot    | 2.0.2     | 2020-11-15 | [1] | CRAN | (R 4.0.0) |
| rstan        | 2.21.2    | 2020-07-27 | [1] | CRAN | (R 4.0.0) |
| scales       | 1.1.1     | 2020-05-11 | [1] | CRAN | (R 4.0.0) |
| StanHeaders  | 2.21.0-7  | 2020-12-17 | [1] | CRAN | (R 4.0.0) |
| tibble       | 3.1.0     | 2021-02-25 | [1] | CRAN | (R 4.0.0) |
| utf8         | 1.2.1     | 2021-03-12 | [1] | CRAN | (R 4.0.0) |
| V8           | 3.4.0     | 2020-11-04 | [1] | CRAN | (R 4.0.0) |
| vctrs        | 0.3.6     | 2020-12-17 | [1] | CRAN | (R 4.0.0) |
| viridisLite  | 0.3.0     | 2018-02-01 | [1] | CRAN | (R 4.0.0) |
| withr        | 2.4.1     | 2021-01-26 | [1] | CRAN | (R 4.0.0) |

- Packages (lme4) -----

| package   | * version | date       | lib | source         |
|-----------|-----------|------------|-----|----------------|
| boot      | 1.3-26    | 2021-01-25 | [1] | CRAN (R 4.0.0) |
| lattice   | 0.20-41   | 2020-04-02 | [1] | CRAN (R 4.0.0) |
| lme4      | 1.1-26    | 2020-12-01 | [1] | CRAN (R 4.0.0) |
| MASS      | 7.3-53    | 2020-09-09 | [1] | CRAN (R 4.0.0) |
| Matrix    | 1.3-2     | 2021-01-06 | [1] | CRAN (R 4.0.0) |
| minqa     | 1.2.4     | 2014-10-09 | [1] | CRAN (R 4.0.0) |
| nlme      | 3.1-152   | 2021-02-04 | [1] | CRAN (R 4.0.0) |
| nloptr    | 1.2.2.2   | 2020-07-02 | [1] | CRAN (R 4.0.0) |
| Rcpp      | 1.0.6     | 2021-01-15 | [1] | CRAN (R 4.0.0) |
| RcppEigen | 0.3.3.9.1 | 2020-12-17 | [1] | CRAN (R 4.0.0) |
| statmod   | 1.4.35    | 2020-10-19 | [1] | CRAN (R 4.0.0) |

# D Exploratory analysis comparing valid with invalid Bayesian replicates

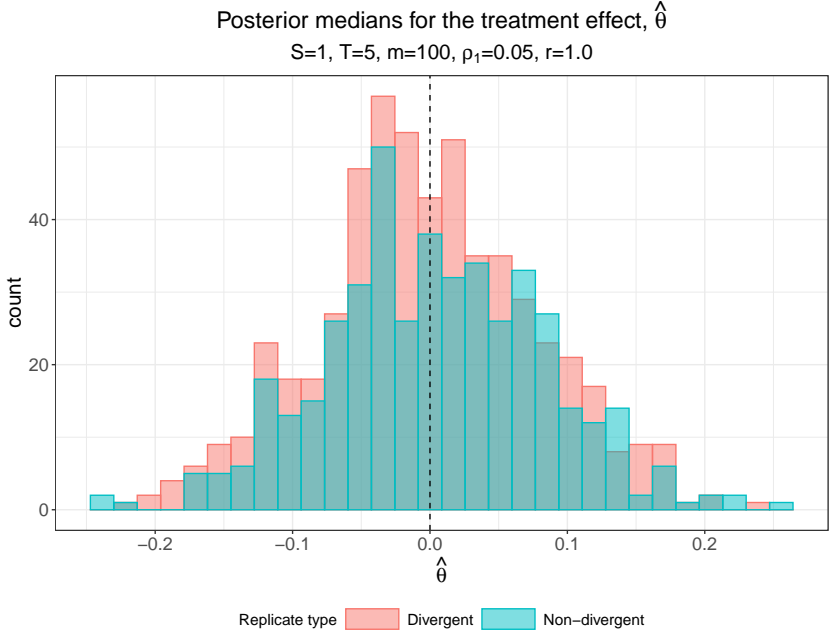

Figure D1: Histograms of marginal posterior medians for  $\hat{\theta}$  for the 558 invalid replicates yielding divergent transitions after warmup (red) and 442 valid replicates without any divergent transitions (blue), for the trial configuration with one cluster per treatment sequence, 5 periods, 100 subjects per cluster-period and with a within-period intracluster correlation of 0.05 and a cluster autocorrelation of 1.0. Note that the shading of the bars is semi-transparent to show overlap between the histograms

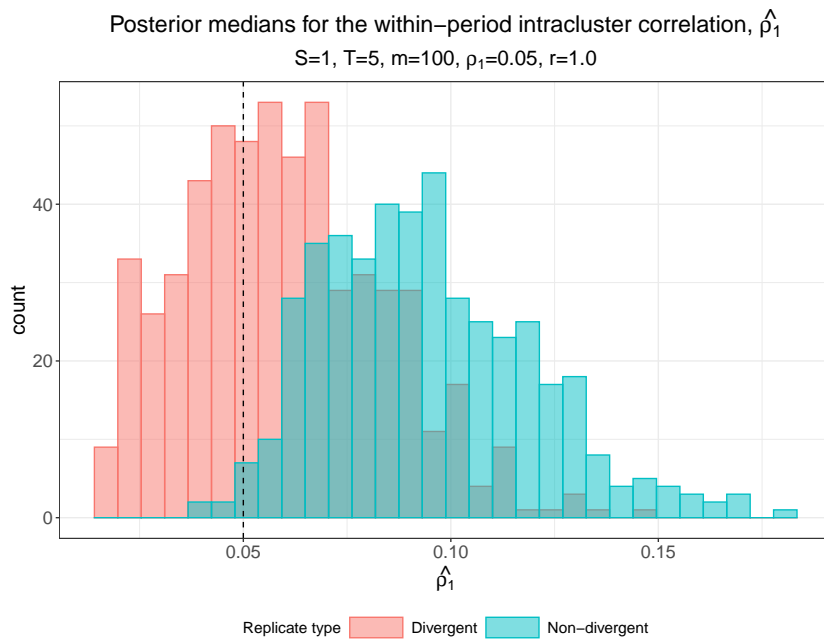

Figure D2: Histograms of marginal posterior medians for  $\hat{\rho}_1$  for the 558 invalid replicates yielding divergent transitions after warmup (red) and 442 valid replicates without any divergent transitions (blue), for the trial configuration with one cluster per treatment sequence, 5 periods, 100 subjects per cluster-period and with a within-period intracluster correlation of 0.05 and a cluster autocorrelation of 1.0. Note that the shading of the bars is semi-transparent to show overlap between the histograms

## E Exploratory analysis comparing results with different treatment effect values

Table E1: Estimated bias ( $\times 10,000$ ) for  $\hat{\theta}$  (MCSEs ( $\times 10,000$ ) in parentheses), for different treatment effect values, for trial configurations with one cluster per treatment sequence, 5 periods and 10 subjects per cluster-period

|          |          | r        |      |       |      |          |      |      |      |
|----------|----------|----------|------|-------|------|----------|------|------|------|
|          |          | 0.8      |      |       |      | 1        |      |      |      |
| $\rho_1$ | $\theta$ | Bayesian |      | REML  |      | Bayesian |      | REML |      |
| 0.05     | 0        | -37.6    | (78) | -43.5 | (80) | 22.9     | (79) | 22.0 | (79) |
|          | 10       | -36.3    | (78) | -43.5 | (80) | 10.5     | (79) | 22.0 | (79) |
|          | 100      | -42.3    | (78) | -43.5 | (80) | -6.6     | (78) | 22.0 | (79) |
| 0.1      | 0        | -39.7    | (85) | -42.8 | (88) | 44.5     | (81) | 27.4 | (82) |
|          | 10       | -38.8    | (85) | -42.8 | (88) | 27.8     | (81) | 27.4 | (82) |
|          | 100      | -50.3    | (85) | -42.8 | (88) | 42.1     | (80) | 27.4 | (82) |

Table E2: Estimated MSE ( $\times 10,000$ ) for  $\hat{\theta}$  (MCSEs ( $\times 10,000$ ) in parentheses), for different treatment effect values, for trial configurations with one cluster per treatment sequence, 5 periods and 10 subjects per cluster-period

|          |          | r        |      |      |      |          |      |      |      |
|----------|----------|----------|------|------|------|----------|------|------|------|
|          |          | 0.8      |      |      |      | 1        |      |      |      |
| $\rho_1$ | $\theta$ | Bayesian |      | REML |      | Bayesian |      | REML |      |
| 0.05     | 0        | 606      | (28) | 643  | (31) | 597      | (27) | 620  | (27) |
|          | 10       | 606      | (28) | 643  | (31) | 590      | (26) | 620  | (27) |
|          | 100      | 607      | (28) | 643  | (31) | 586      | (27) | 620  | (27) |
| 0.1      | 0        | 725      | (33) | 770  | (36) | 637      | (29) | 664  | (29) |
|          | 10       | 722      | (33) | 770  | (36) | 638      | (29) | 664  | (29) |
|          | 100      | 722      | (33) | 770  | (36) | 627      | (29) | 664  | (29) |
